# Supplementary material
Source: PubMed Central journal article supplement (PMC4439006)
Supplement: NIHMS535394-supplement-01.pdf [file NIHMS535394-supplement-01.pdf]

## Supporting Information

# **Maximizing gene delivery efficiencies of cationic helical polypeptides via balanced membrane penetration and cellular targeting**

Nan Zheng,<sup>§</sup> Lichen Yin,<sup>§</sup> Ziyuan Song, Liang Ma, Haoyu Tang, Nathan P. Gabrielson, Hua Lu  
and Jianjun Cheng\*

Department of Materials Science and Engineering,

University of Illinois at Urbana–Champaign, 1304 W. Green Street, Urbana, IL, 61801, USA

\*Corresponding Author: [jianjunc@illinois.edu](mailto:jianjunc@illinois.edu); Phone: 217-244-3924; Fax: 217-333-2736

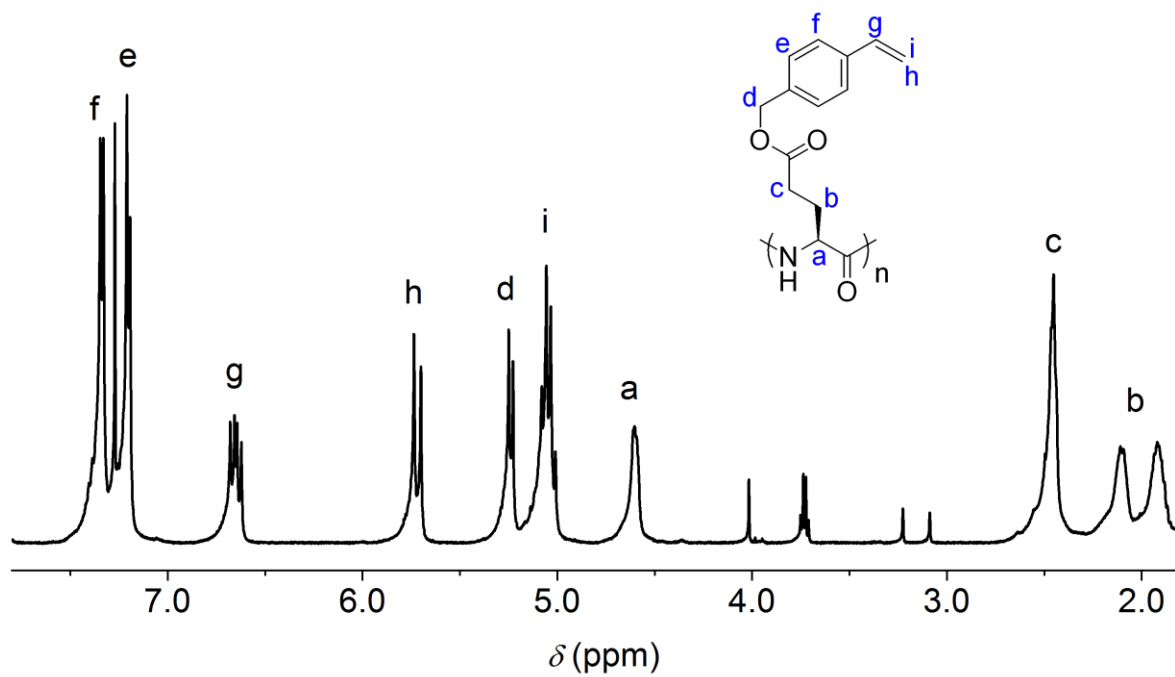

**Fig. S1.**  $^1\text{H}$  NMR spectrum of PVBLG in  $\text{CDCl}_3/\text{TFA-}d$  (85:15, v/v).

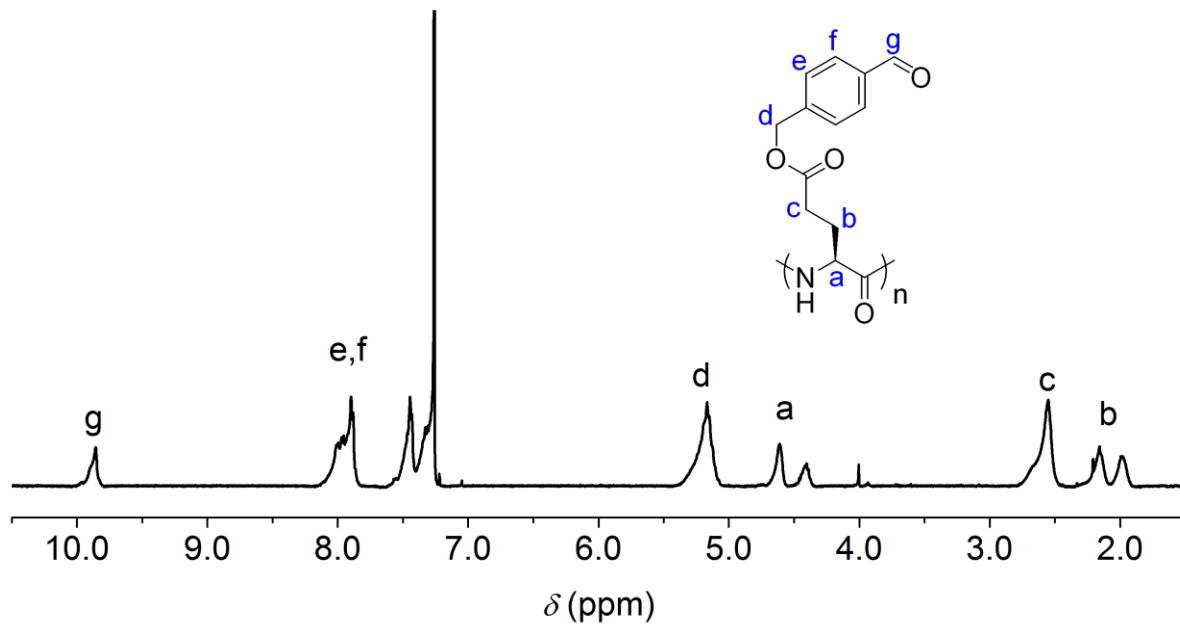

**Fig. S2.**  $^1\text{H}$  NMR spectrum of PABLG in  $\text{CDCl}_3/\text{TFA-}d$  (85:15, v/v).

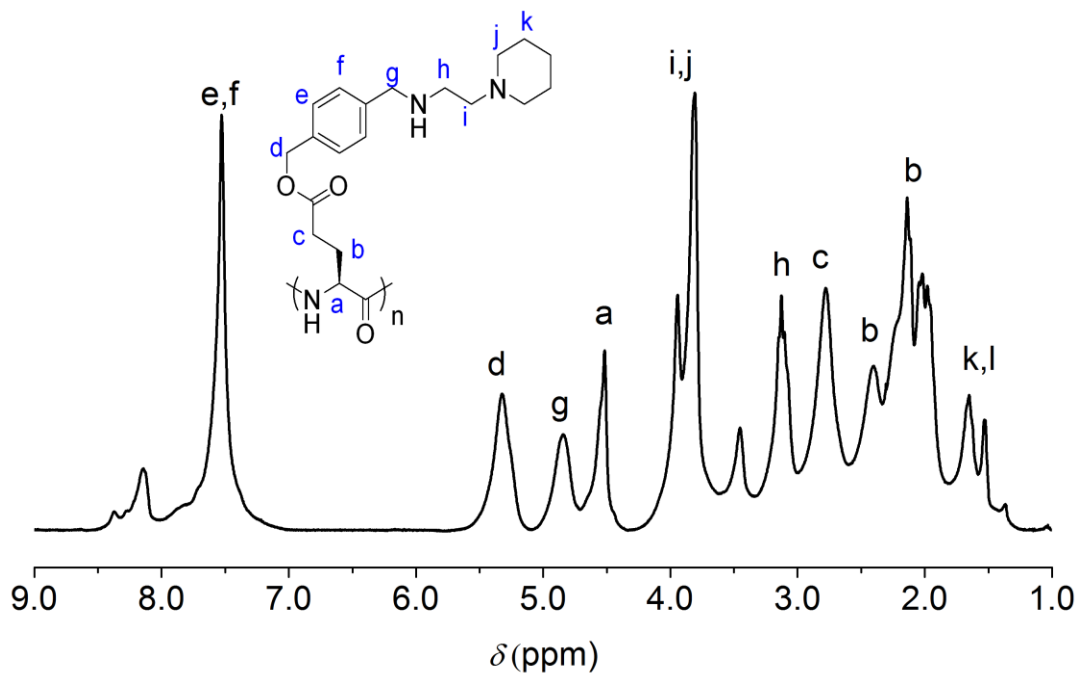

**Fig. S3.**  $^1\text{H}$  NMR spectrum of PVBLG-8 in  $\text{TFA-d}$ .

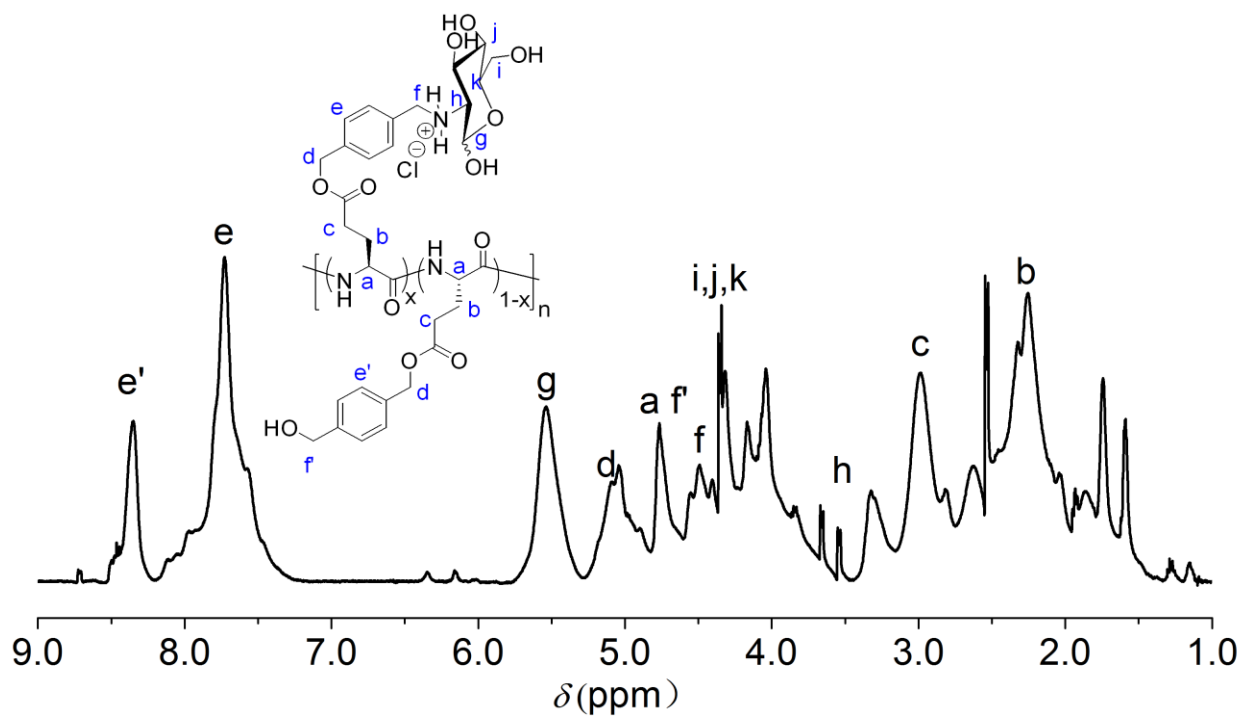

**Fig. S4.**  $^1\text{H}$  NMR spectrum of PVBLG-7 in  $\text{TFA-d}$ .

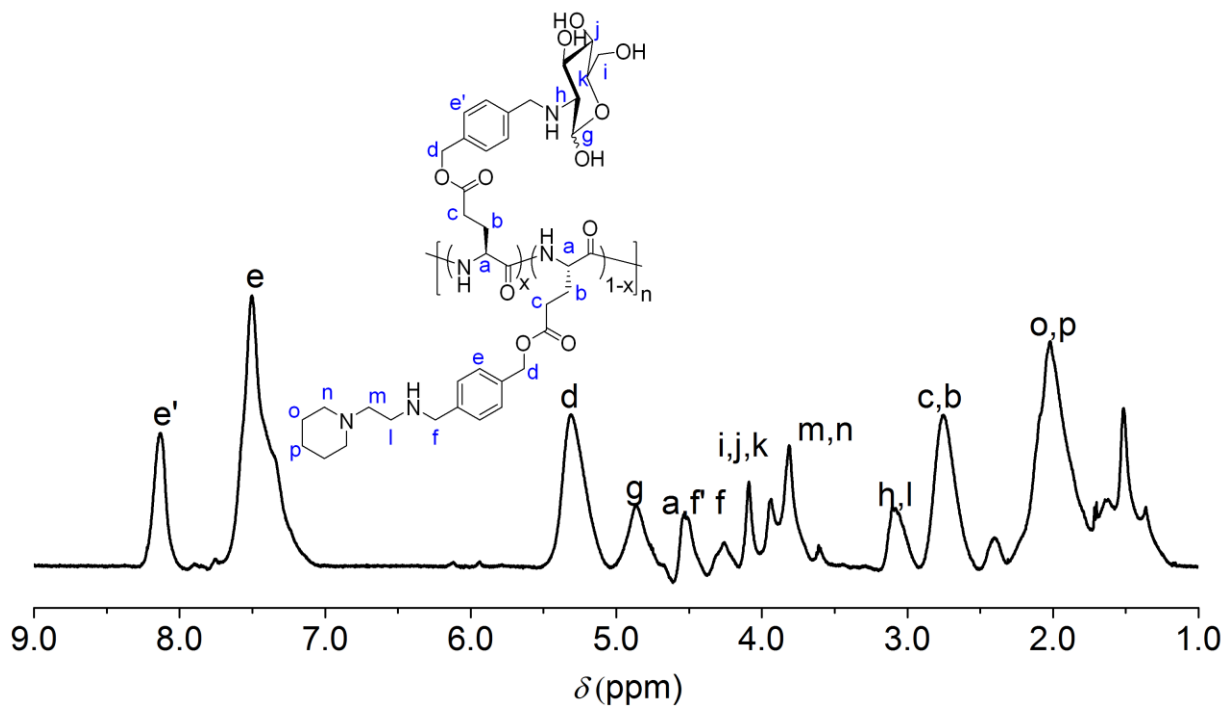

**Fig. S5.**  $^1\text{H}$  NMR spectrum of PVBLG-8-r-7 in  $\text{TFA-d}$ .

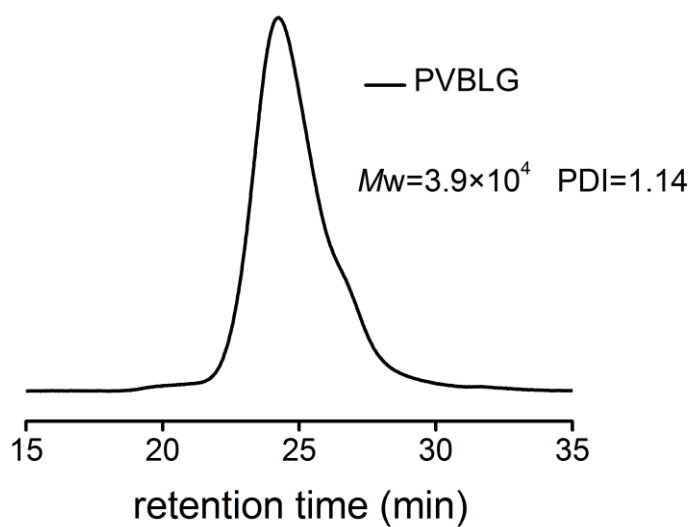

**Fig. S6.** GPC curve of PVBLG obtained from HMDS-initiated polymerization of VB-L-Glu-NCA at the M/I ratio of 150/1. The MW and PDI of the resulting PVBLG were summarized in the figure.

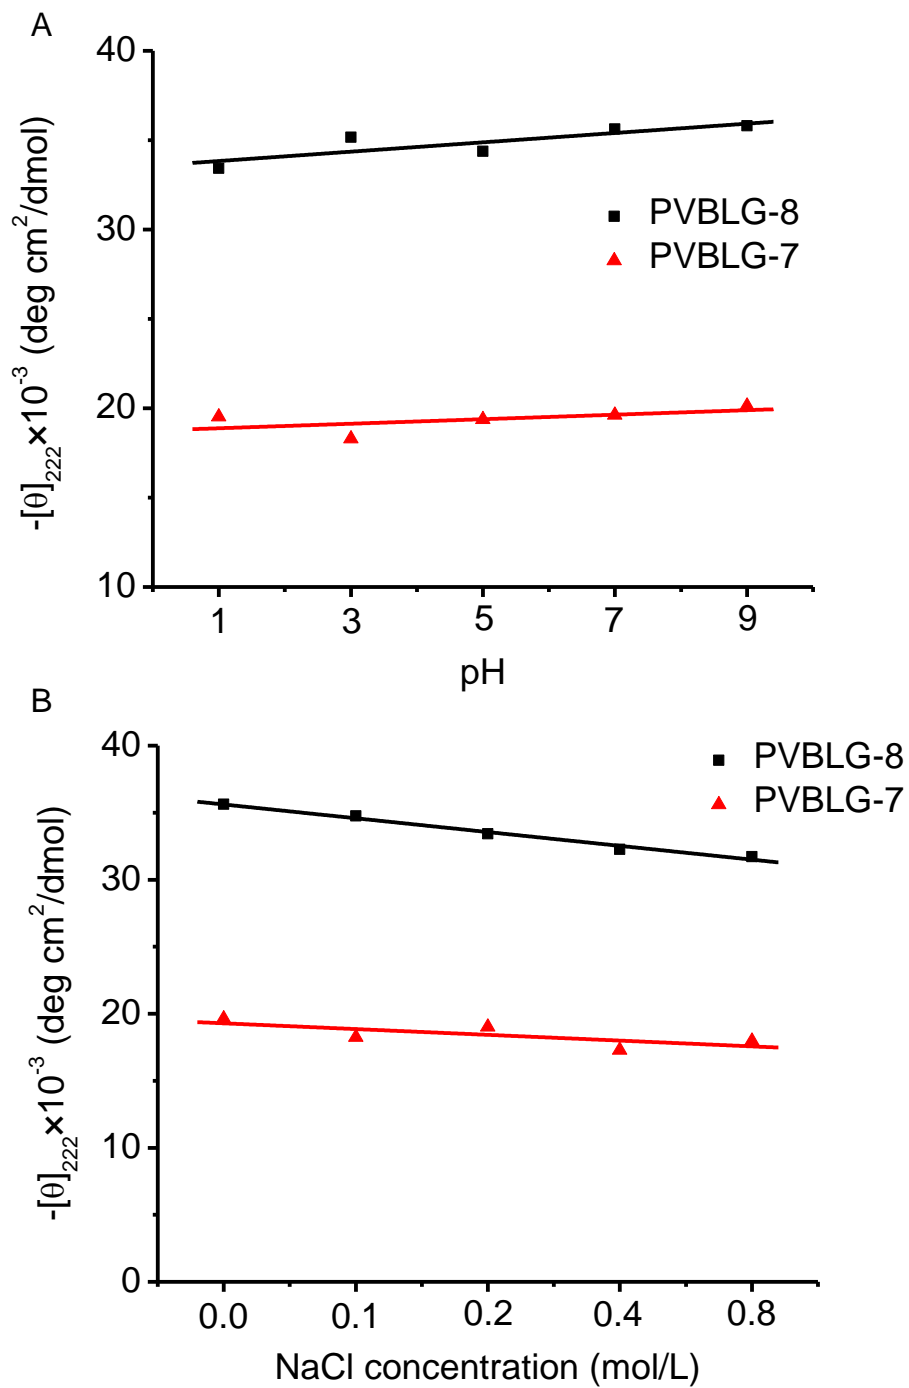

**Fig. S7.** Residue molar ellipticity at 222 nm of PVBLG-8 and PVBLG-7 at different pH (A) and NaCl concentrations (B).



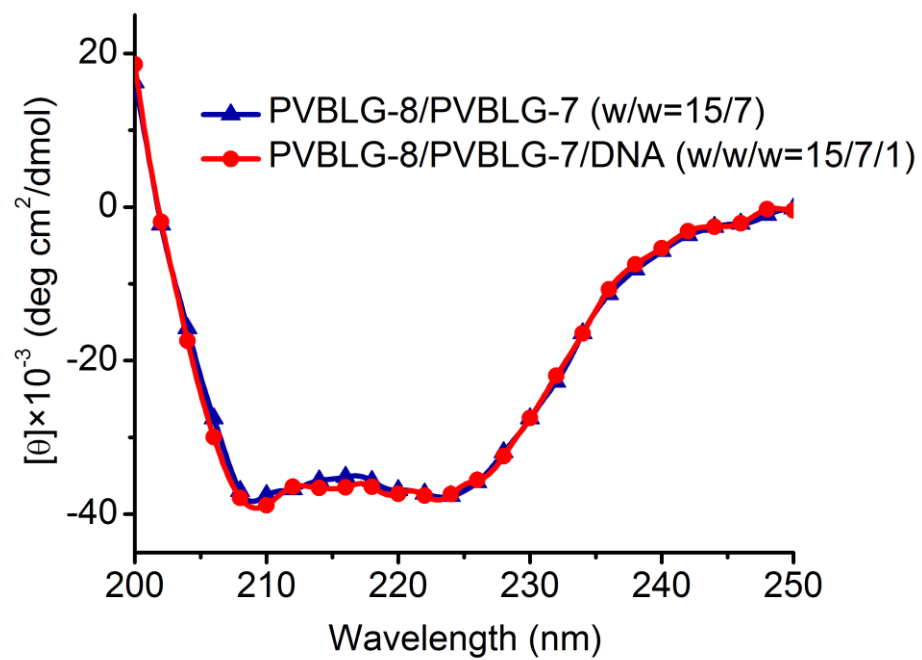

**Fig. S8.** CD spectra of PVBLG-8/PVBLG-7 mixtures and their ternary complexes with DNA in DI water at pH 7.

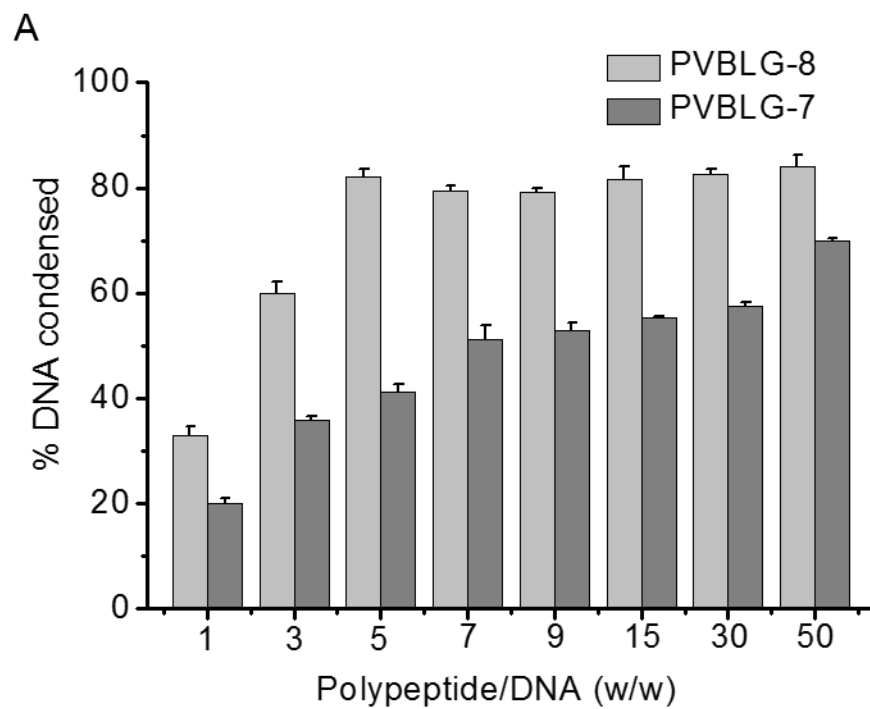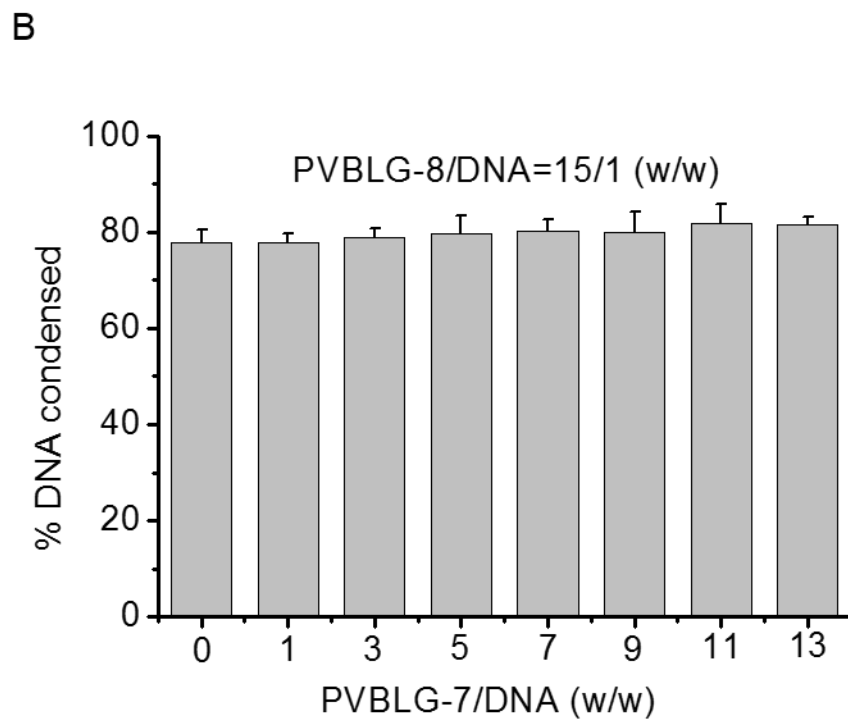

**Fig. S9.** EB exclusion assay showing the condensation of DNA in the binary complexes (A) and ternary complexes (B) PVBLG-8/DNA weight ratio fixed at 15/1 (n=3).

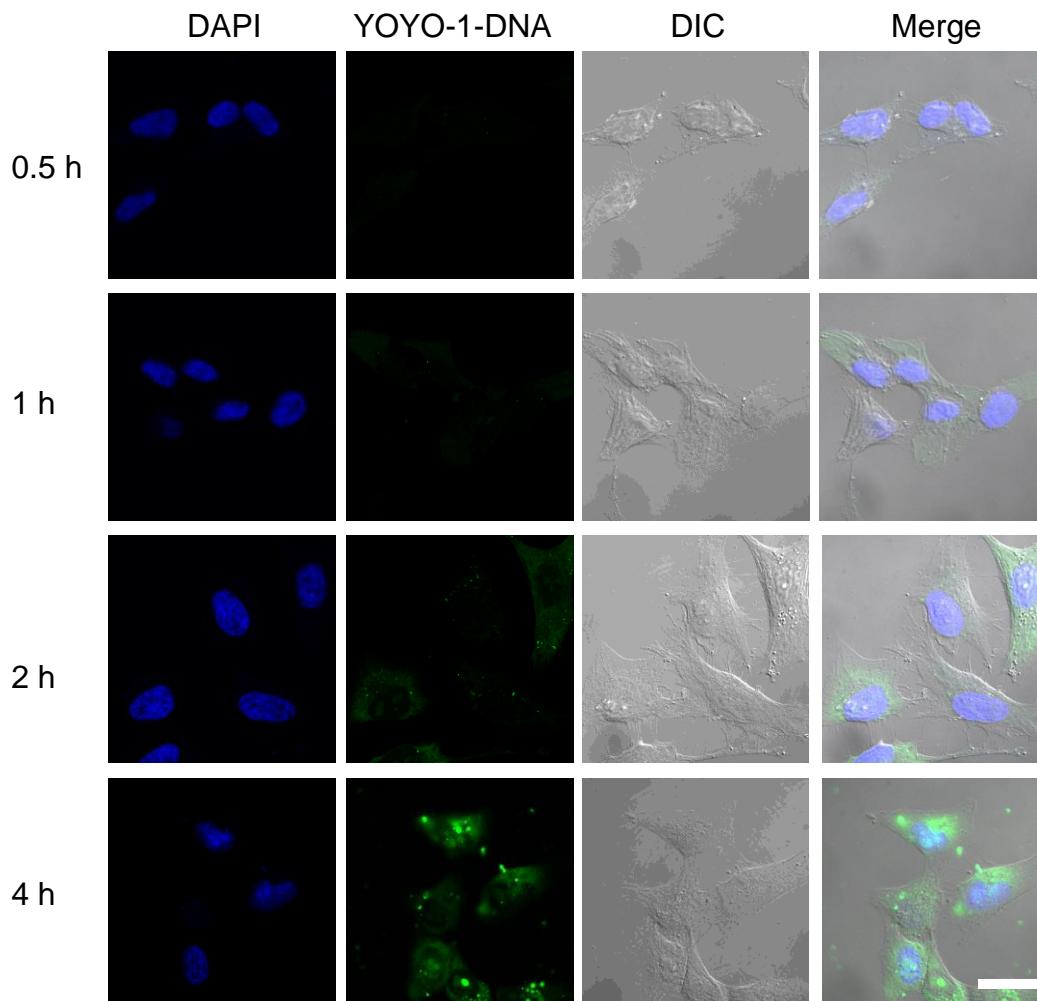

**Fig. S10.** CLSM images showing the cellular internalization of ternary complexes (PVBLG-8/PVBLG-7/DNA weight ratio of 15/7/1) in HeLa cells following incubation at 37 °C for 0.5, 1, 2, and 4 h (bar = 20  $\mu$ m).

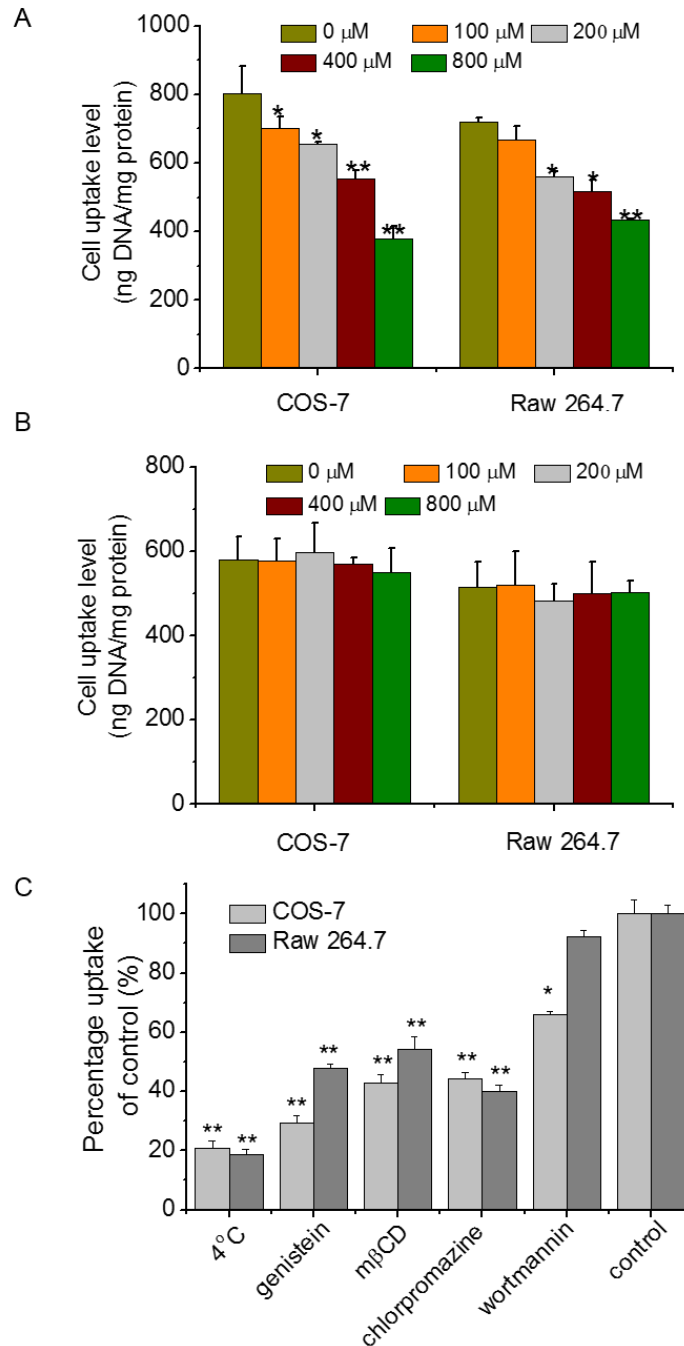

**Fig. S11.** Uptake level of YOYO-1-DNA-containing ternary complexes (PVBLG-8/PVBLG-7/DNA weight ratio of 15/3/1, A) and binary complexes (PVBLG-8/DNA weight ratio of 15/1, B) in COS-7 and Raw 264.7 cells in the presence of free mannose at various concentrations (n=3). (C) Uptake level of ternary complexes (PVBLG-8/PVBLG-7/DNA weight ratio of 15/3/1) in the presence of various endocytosis inhibitors in COS-7 and Raw 264.7 cells (n = 3).

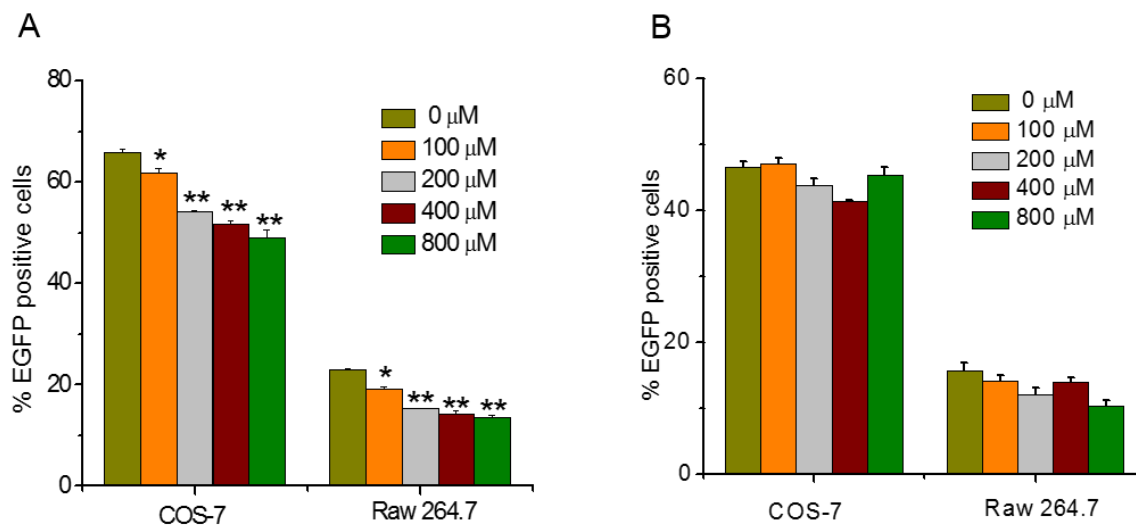

**Fig. S12.** *In vitro* transfection efficiency of ternary complexes (PVBLG-8/PVBLG-7/DNA weight ratio of 15/3/1, A) and binary complexes (PVBLG-8/DNA weight ratio of 15/1, B) in COS-7 and Raw 264.7 cells in the presence of free mannose at various concentrations (n=3).

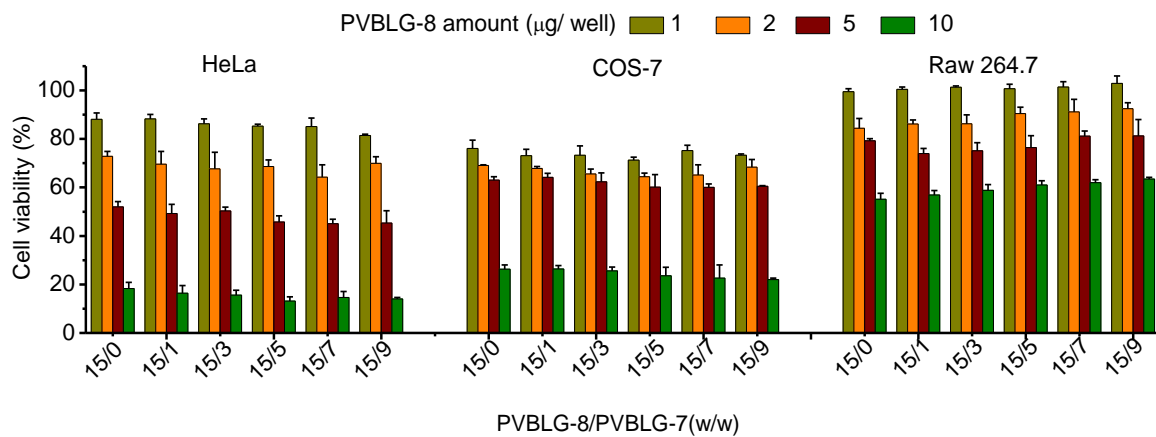

**Fig. S13.** Cytotoxicity of PVBLG-8/PVBLG-7 mixtures at different weight ratios in HeLa, COS-7, and Raw 264.7 cells following 24-h treatment (n=3).
